# Supplementary material for: Evaluation of Suppressed Mite Reproduction (SMR) Reveals Potential for Varroa Resistance in European Honey Bees (Apis mellifera L.)
Source: PubMed Central journal article supplement (PMC7565386; doi:10.3390/insects11090595), 2020-09-03
Supplement: insects-11-00595-s001.pdf [file insects-11-00595-s001.pdf]

## Supplementary Material

**Table 1.** Simulation results for the precision of the SMR estimates.

| I   | S    | Loq  | Hiq  | Mae   | Rmse  | Med  | M    |
|-----|------|------|------|-------|-------|------|------|
| 10  | 0.20 | 0.01 | 0.58 | 0.129 | 0.166 | 0.22 | 0.25 |
| 10  | 0.35 | 0.06 | 0.74 | 0.148 | 0.183 | 0.36 | 0.37 |
| 10  | 0.50 | 0.14 | 0.85 | 0.154 | 0.188 | 0.49 | 0.50 |
| 10  | 0.70 | 0.29 | 0.95 | 0.144 | 0.178 | 0.68 | 0.67 |
| 35  | 0.20 | 0.06 | 0.41 | 0.074 | 0.093 | 0.20 | 0.22 |
| 35  | 0.35 | 0.15 | 0.57 | 0.087 | 0.109 | 0.35 | 0.36 |
| 35  | 0.50 | 0.28 | 0.71 | 0.091 | 0.113 | 0.50 | 0.50 |
| 35  | 0.70 | 0.47 | 0.87 | 0.084 | 0.105 | 0.69 | 0.69 |
| 100 | 0.20 | 0.10 | 0.32 | 0.044 | 0.056 | 0.20 | 0.21 |
| 100 | 0.35 | 0.22 | 0.48 | 0.053 | 0.066 | 0.35 | 0.35 |
| 100 | 0.50 | 0.36 | 0.63 | 0.055 | 0.069 | 0.49 | 0.50 |
| 100 | 0.70 | 0.56 | 0.81 | 0.051 | 0.064 | 0.69 | 0.70 |

Statistics of the posterior distribution of the SMR estimates are given for varying values of the number of single-infested cells (*i*) and true SMR value (*s*); The statistics are: loq, 2.5% quantile; hiq, 97.5% quantile, mae: mean average error, rmse: root mean squared error, med: median, m: mean.
